# Supplementary material for: Driving new technologies in hospitals: association of organizational and personal factors with the readiness of neonatal intensive care unit staff toward webcam implementation
Source: Springer Nature journal article supplement (doi:10.1186/s12913-022-08072-5), 2022-06-17
Supplement: MOESM1 [file 23177350]

**Readiness for Change Scale**

|                                                                                                            | Strongly disagree        | Rather disagree          | Neither                  | Rather agree             | Strongly agree           |
|------------------------------------------------------------------------------------------------------------|--------------------------|--------------------------|--------------------------|--------------------------|--------------------------|
| I consider the introduction of webcams in neonatological intensive care units is basically the right step. | <input type="checkbox"/> | <input type="checkbox"/> | <input type="checkbox"/> | <input type="checkbox"/> | <input type="checkbox"/> |
| I am ready to play a key role in the introduction of the webcams.                                          | <input type="checkbox"/> | <input type="checkbox"/> | <input type="checkbox"/> | <input type="checkbox"/> | <input type="checkbox"/> |
| I am ready to make an extra effort for the introduction of the webcams.                                    | <input type="checkbox"/> | <input type="checkbox"/> | <input type="checkbox"/> | <input type="checkbox"/> | <input type="checkbox"/> |
| I have a good feeling about the use of webcams on our ward.                                                | <input type="checkbox"/> | <input type="checkbox"/> | <input type="checkbox"/> | <input type="checkbox"/> | <input type="checkbox"/> |
| I would see the use of webcams as a positive development on our ward.                                      | <input type="checkbox"/> | <input type="checkbox"/> | <input type="checkbox"/> | <input type="checkbox"/> | <input type="checkbox"/> |
