# Supplementary material for: Driving new technologies in hospitals: association of organizational and personal factors with the readiness of neonatal intensive care unit staff toward webcam implementation
Source: Springer Nature journal article supplement (doi:10.1186/s12913-022-08072-5), 2022-06-17
Supplement: MOESM3 [file 23177350]

### Technology Acceptance Scale

|                                                                                                    | Not true at all          | Rather not true          | Partly true              | Rather true              | Entirely true            |
|----------------------------------------------------------------------------------------------------|--------------------------|--------------------------|--------------------------|--------------------------|--------------------------|
| I am very curious about new technical developments.                                                | <input type="checkbox"/> | <input type="checkbox"/> | <input type="checkbox"/> | <input type="checkbox"/> | <input type="checkbox"/> |
| I quickly take a liking to new technical developments.                                             | <input type="checkbox"/> | <input type="checkbox"/> | <input type="checkbox"/> | <input type="checkbox"/> | <input type="checkbox"/> |
| I am always interested in using the latest technical equipment.                                    | <input type="checkbox"/> | <input type="checkbox"/> | <input type="checkbox"/> | <input type="checkbox"/> | <input type="checkbox"/> |
| If I had the opportunity, I would use use technical products much more often than I do at present. | <input type="checkbox"/> | <input type="checkbox"/> | <input type="checkbox"/> | <input type="checkbox"/> | <input type="checkbox"/> |
