# Supplementary material for: Driving new technologies in hospitals: association of organizational and personal factors with the readiness of neonatal intensive care unit staff toward webcam implementation
Source: Springer Nature journal article supplement (doi:10.1186/s12913-022-08072-5), 2022-06-17
Supplement: MOESM5 [file 23177350]

## List of consortium members

### Neo-CamCare

Dr. Nadine Scholten<sup>1</sup>, Prof. Dr. Andreas Müller<sup>2</sup>, Dr. Till Dresbach<sup>2</sup>, Prof. Dr. Martin Hellmich<sup>3</sup>, Christina Samel<sup>3</sup>, Prof. Dr. Christiane Woopen<sup>4</sup>, Christiane Jannes<sup>5</sup>, Prof. Dr. Ludwig Kuntz<sup>6</sup>, Prof. Dr. Indra Spiecker gen. Döhmann<sup>7</sup>, Dr. Sebastian Bretthauer<sup>7</sup>, Dr. Dirk Horenkamp-Sonntag<sup>8</sup>, Stefanie Wobbe-Ribinski<sup>9</sup>

<sup>3</sup>Institute of Medical Statistics and Computational Biology, University Hospital Cologne, Cologne, Germany. <sup>4</sup>Center for Life Ethics, University of Bonn, Bonn, Germany. <sup>5</sup>Cologne center for ethics, rights, economics, and social sciences of health, University of Cologne, Cologne, Germany. <sup>6</sup>Department of Business Administration and Health Care Management, University of Cologne, Cologne, Germany. <sup>7</sup>Data Protection Research Unit, Goethe-University of Frankfurt, Frankfurt, Germany. <sup>8</sup>Techniker Krankenkasse, Hamburg, Germany. <sup>9</sup>DAK Gesundheit, Hamburg, Germany.
